# Supplementary material for: Elucidating the cation hydration ratio in water-in-salt electrolytes for carbon-based supercapacitors
Source: Royal Society of Chemistry journal article supplement (doi:10.1039/d2cp03976a), 2022-01-01
Supplement: d2cp03976a1.pdf [file d2cp03976a1.pdf]

ARTICLE

## Elucidating Cation Hydration Ratio in Water-in-Salt Electrolyte for Carbon-based Supercapacitor

Dewei Xiao<sup>a</sup>, Xueqing Tang<sup>a</sup>, Li Zhang<sup>b</sup>, Zhenming Xu<sup>a</sup>, Qingsheng Liu<sup>c</sup>, Hui Dou<sup>a</sup>, Xiaogang Zhang<sup>a\*</sup>

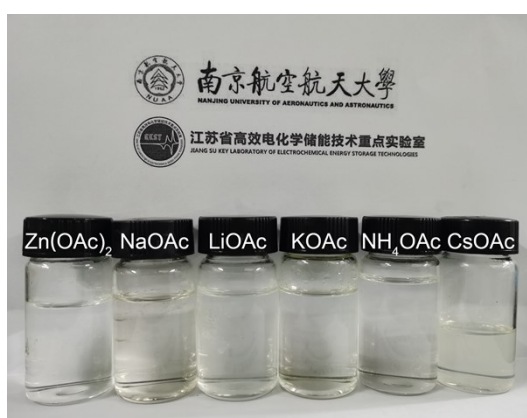

Fig. S1 Photo of completed dissolved saturated acetate-based electrolytes with different cations.

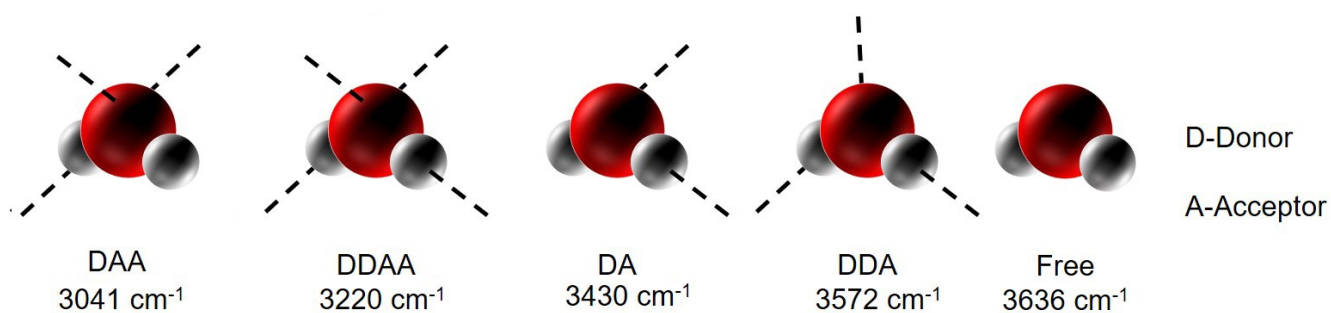

Fig. S2 Schematic diagram of water molecules in different vibrational states.

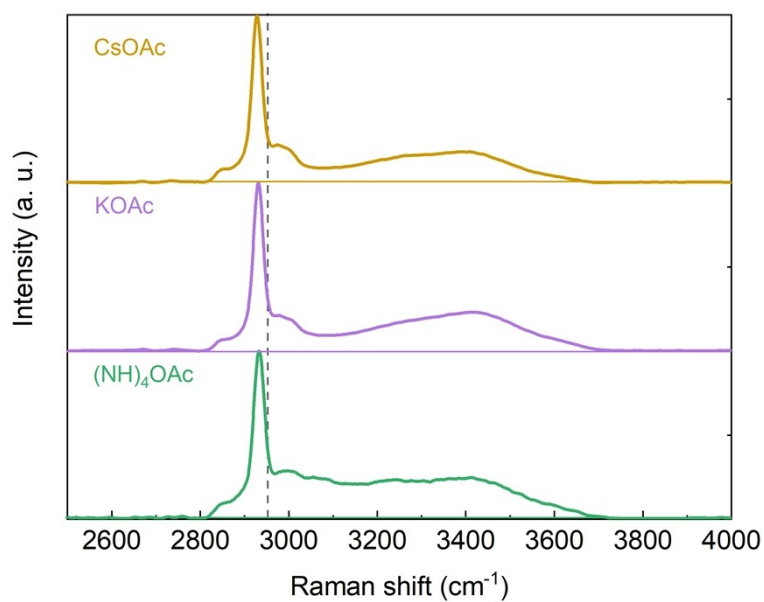

**Fig. S3** The Raman spectra of saturated aqueous acetate electrolytes with different cations range from 2500  $\text{cm}^{-1}$  to 4000  $\text{cm}^{-1}$ .

<sup>a</sup> Jiangsu Key Laboratory of Electrochemical Energy Storage Technologies, College of Materials Science and Technology, Nanjing University of Aeronautics and Astronautics, Nanjing, 210016, P. R. China..

<sup>b</sup> Department of Physics, School of Science, Lanzhou University of Technology, Lanzhou 730050, China.

<sup>c</sup> School of Resource and Environmental Engineering, Jiangxi University of Science and Technology, Ganzhou 341000, PR China.

\*Corresponding author. E-mail: azhangxg@nuaa.edu.cn

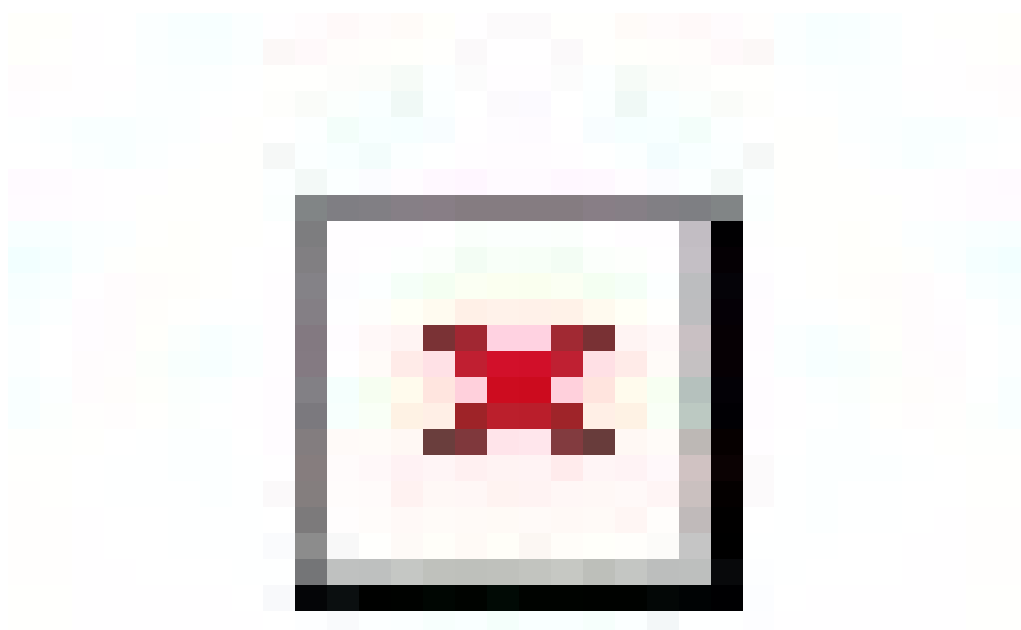

**Fig. S4** The annealing as a function of (a) temperature-time and (b) density-time. The equilibration processes as a function of (c) temperature-time and (d) density-time.

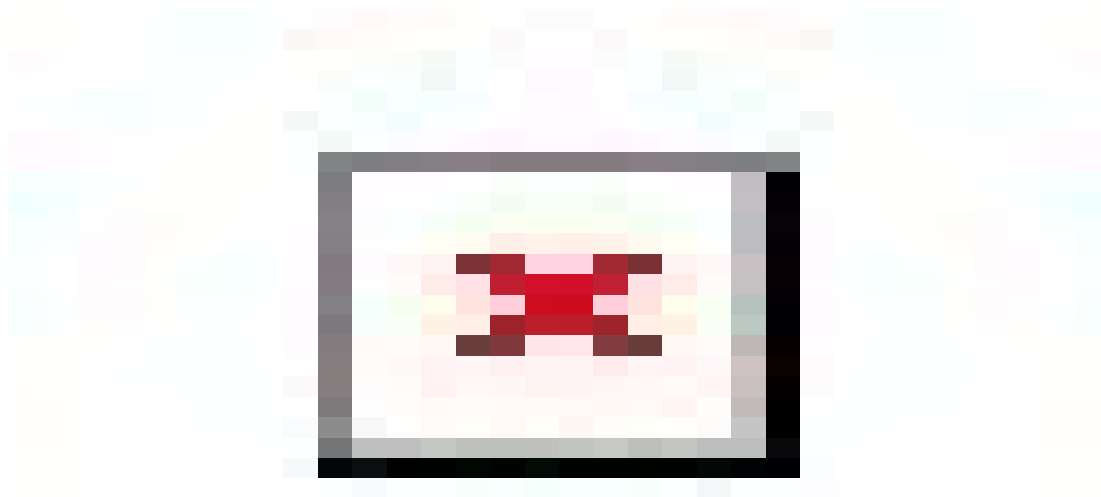

**Fig. S5** (a) Cyclic voltammograms potential window opening experiments. CVs were performed in three-electrode systems at  $10 \text{ mV s}^{-1}$ . (b) S-value of maximum operating potential for AC electrode in different WIS electrolytes.

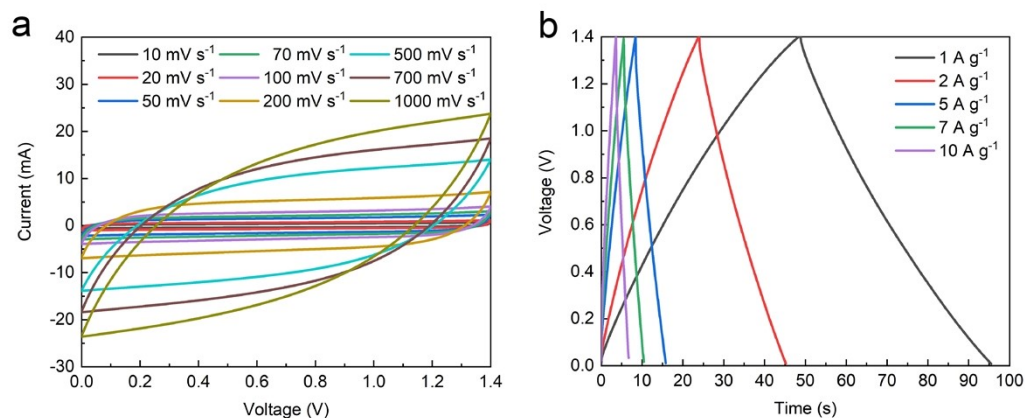

**Fig. S6** Rate performance of NH<sub>4</sub>-based SC. (a) CV curves at 10 mV s<sup>-1</sup> to 1000 mV s<sup>-1</sup>. (b) GCD curves at 1 A g<sup>-1</sup> to 10 A g<sup>-1</sup>.

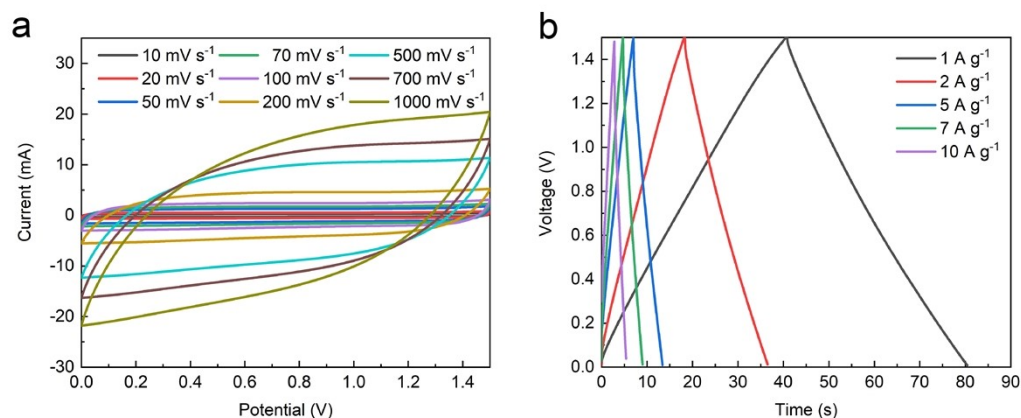

**Fig. S7** Rate performance of K-based SC. (a) CV curves at 10 mV s<sup>-1</sup> to 1000 mV s<sup>-1</sup>. (b) GCD curves at 1 A g<sup>-1</sup> to 10 A g<sup>-1</sup>.

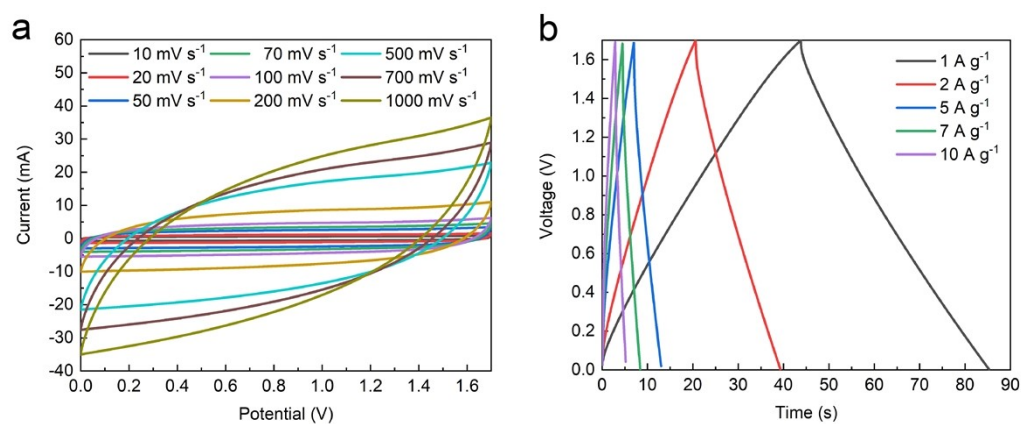

**Fig. S8** Rate performance of Cs-based SC. (a) CV curves at 10 mV s<sup>-1</sup> to 1000 mV s<sup>-1</sup>. (b) GCD curves at 1 A g<sup>-1</sup> to 10 A g<sup>-1</sup>.

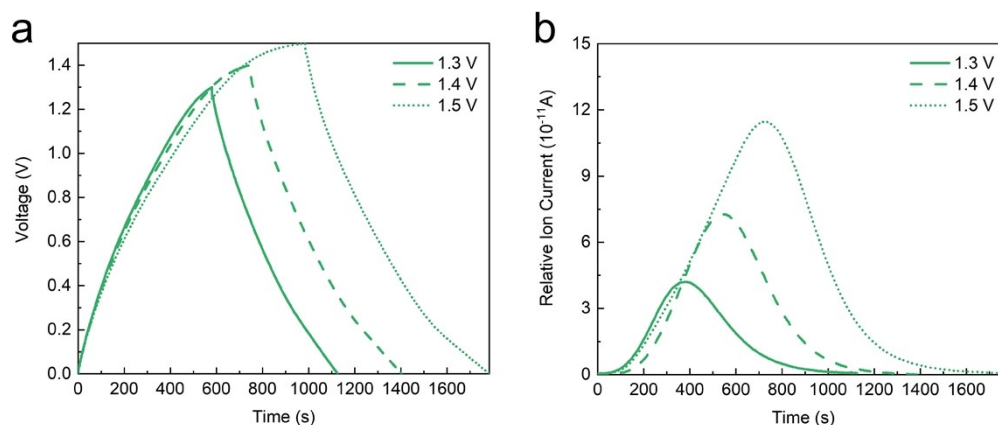

**Fig. S9** The gas production analysis of  $\text{NH}_4$ -based SC at 1.3~1.5 V. (a) Galvanostatic charge-discharge curves at  $0.1 \text{ A g}^{-1}$ . (b) DEMS signals about  $\text{H}_2$ .

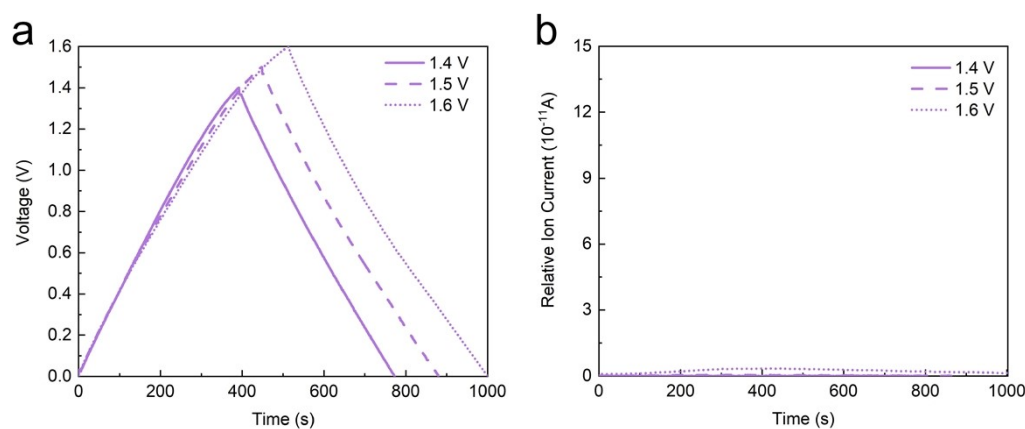

**Fig. S10** The gas production analysis of K-based SC at 1.4~1.6 V. (a) Galvanostatic charge-discharge curves at  $0.1 \text{ A g}^{-1}$ . (b) DEMS signals about  $\text{H}_2$ .

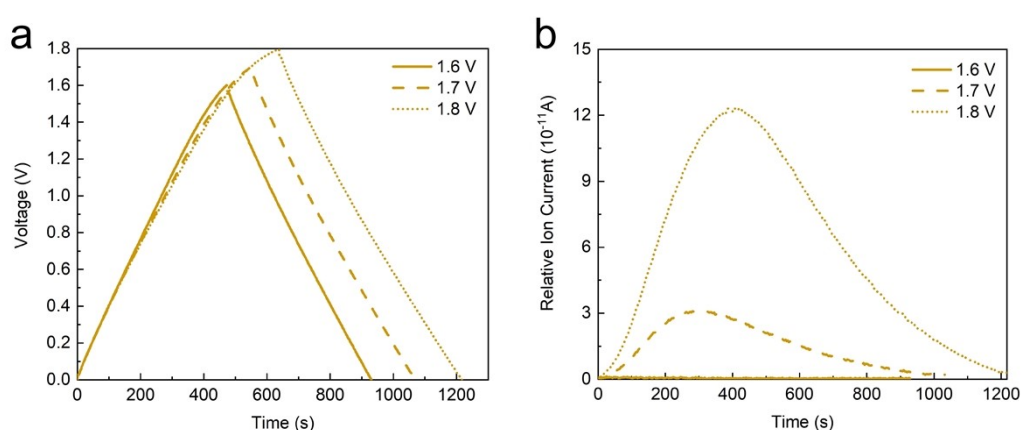

**Fig. S11** The gas production analysis of Cs-based SC at 1.6~1.8 V. (a) Galvanostatic charge-discharge curves at  $0.1 \text{ A g}^{-1}$ . (b) DEMS signals about  $\text{H}_2$ .

**Table S1** The ionic size and solvation structure of different cations<sup>1</sup>

| Ion                          | BR (nm) | HR (nm) |
|------------------------------|---------|---------|
| K <sup>+</sup>               | 0.133   | 0.331   |
| Cs <sup>+</sup>              | 0.186   | 0.329   |
| NH <sub>4</sub> <sup>+</sup> | 0.148   | 0.331   |

**Table S2** The number of simulated molecules in different WIS electrolytes systems

| Electrolyte         | Cations | Anions | H <sub>2</sub> O molecules |
|---------------------|---------|--------|----------------------------|
| KOAc                | 200     | 200    | 420                        |
| CsOAc               | 300     | 300    | 330                        |
| NH <sub>4</sub> OAc | 100     | 100    | 290                        |

**Table S3** The density of SCs with different cations at room temperature.

|                               | NH <sub>4</sub> OAc | KOAc   | CsOAc  |
|-------------------------------|---------------------|--------|--------|
| Density (g cm <sup>-3</sup> ) | 1.0974              | 1.3661 | 2.1152 |

**Table S4** The self-discharge of SCs with different cations.

|                                                             | NH <sub>4</sub> OAc | KOAc | CsOAc |
|-------------------------------------------------------------|---------------------|------|-------|
| Voltage of SCs self-discharge (V)                           | 0.61                | 0.70 | 0.92  |
| Voltage retention rate of SCs self-discharge after 12 h (%) | 43.6                | 46.6 | 54.1  |

## Notes and references

1. A. G. Volkov, S. Paula and D. W. Deamer, *Bioelectrochem. Bioenerg.*, 1997, **42**, 153-160.
